# Supplementary material for: Molecular Structure, Spectroscopic Characterization, and Nonlinear Optical Properties of 4-Hydroxycoumarin: A DFT Approach
Source: Research Square preprint supplement (doi:10.21203/rs.3.rs-8112972/v1), 2025-11-17
Supplement: Supplementary file 1 [file a13e575a26201a57b7f7a3bc.docx]

**Supporting information for**

**Molecular Structure, Spectroscopic Characterization, and Nonlinear Optical Properties of 4-Hydroxycoumarin: A DFT Approach**

Hema*1, Nisha Fatma2, Tara Bhatt3

1A.P.B. Govt. P. G. College, Agastyamuni-246421, India

2DSB Campus, Kumaun University Nainital-263001, India

3LBS Govt. P.G. College, Halduchaur (Nainital) Uttarakhand-263139, India

**Optimized Geometry**

**Gaussian optimized Geometry details-**

1. **Cartesian coordinate of optimized geometry of *4HC*:**
   1. **Ground state**

Gaussian 09: IA32W-G09RevB.01

# opt b3lyp/6-311++g(d,p) geom=connectivity

---------------------------------------------------------------------

Center Atomic Atomic Coordinates (Angstroms)

Number Number Type X Y Z

---------------------------------------------------------------------

1 8 0 0.301466 -1.660531 0.000000

2 8 0 -2.190285 1.634881 0.000000

3 8 0 -1.435297 -3.057354 0.000000

4 6 0 0.000000 0.739693 0.000000

5 6 0 0.818365 -0.401066 0.000000

6 6 0 -1.429200 0.517986 0.000000

7 6 0 0.597492 2.011077 0.000000

8 6 0 2.208303 -0.281364 0.000000

9 6 0 -1.933289 -0.742171 0.000000

10 6 0 1.977462 2.132163 0.000000

11 6 0 2.779656 0.983219 0.000000

12 6 0 -1.077011 -1.908733 0.000000

13 1 0 -0.038178 2.886982 0.000000

14 1 0 2.809910 -1.181402 0.000000

15 1 0 -2.998287 -0.938975 0.000000

16 1 0 2.435754 3.113548 0.000000

17 1 0 3.859281 1.079061 0.000000

18 1 0 -3.126226 1.399996 0.000000

---------------------------------------------------------------------

- 1. **Excited state**

Gaussian 09: IA32W-G09RevB.01

# opt td b3lyp/6-311++g(d,p) geom=connectivity

---------------------------------------------------------------------

Center Atomic Atomic Coordinates (Angstroms)

Number Number Type X Y Z

---------------------------------------------------------------------

1 8 0 0.399161 -1.635450 0.000000

2 8 0 -2.179398 1.663640 0.000000

3 8 0 -1.483015 -3.116345 0.000000

4 6 0 0.000000 0.725647 0.000000

5 6 0 0.867566 -0.424644 0.000000

6 6 0 -1.424293 0.521206 0.000000

7 6 0 0.595677 1.973146 0.000000

8 6 0 2.282543 -0.247341 0.000000

9 6 0 -2.018857 -0.749090 0.000000

10 6 0 2.020149 2.135240 0.000000

11 6 0 2.856773 1.031693 0.000000

12 6 0 -1.329117 -1.945543 0.000000

13 1 0 -0.033916 2.854067 0.000000

14 1 0 2.890119 -1.144104 0.000000

15 1 0 -3.099466 -0.849993 0.000000

16 1 0 2.429087 3.138397 0.000000

17 1 0 3.932954 1.147487 0.000000

18 1 0 -3.115401 1.437495 0.000000

---------------------------------------------------------------------
